# Supplementary material for: Posttraumatic growth in palliative care: Understanding patients' experiences through life stories
Source: Research Square preprint supplement (doi:10.21203/rs.3.rs-7640707/v1), 2025-10-22
Supplement: Supplementary file 1 [file 058ddcf9d96e9d5de75f2eba.pdf]

## **Guided interview to transition to the biographical narrative interpretation method (BNIM)**

---

### **Life story (phase 1): Spontaneous narrative**

As you know, I am conducting a project that focuses on people's life stories, in health and illness.

In a moment, I will ask you to tell me your story. You can take your time. I will listen to you without interrupting. I will just take a few notes on what you say, in case I have any questions once you have finished your story.

So, please tell me the story of your life, in health and especially in sickness; all the experiences and events that are important to you personally.

## **II**

### **Life story (phase 2): exploration of key events/experiences**

You said "... " (verbatim quote from the participant)

- Do you remember a particular moment/occasion/period/situation/example when this happened?
- Do you remember how your thoughts and feelings changed during that period?
- Do you remember any more details about... / during that period?
- Would you like to add anything else about this?
- (- How would you explain...)

## **Additional questions**

---

## **III**

### **Illness narrative: exploring key experiences & changes**

#### **Changes**

##### *General/open-ended questions*

What was important to you in life before the illness? And now?

- How did you experience/are you experiencing these changes?
- How do you explain these changes?
- How did you cope with them?

##### *Specific areas of change to explore:*

Do you feel that your illness has changed your [area...]?

- |                                |                             |
|--------------------------------|-----------------------------|
| • Personality/self-image       | • Social role/relationships |
| • Attitudes, values            | • Quality of life           |
| • Emotions, feelings           |                             |
| • Beliefs, faith, spirituality |                             |
| • Physical abilities           |                             |
| • Ability to work              |                             |

- How did you experience/are you experiencing these changes?
- How do you explain these changes?
- How did you cope with them?

### **Key moments**

Could you tell me your story from the moment when:

- your symptoms began (before you were diagnosed)
- you were told your current diagnosis
- you were hospitalized
- you were at home during your treatment
- you were referred to palliative care

(How did things go for you after that?)
